# Supplementary material for: Bone Morphogenetic Protein 10—A Novel Biomarker to Predict Adverse Outcomes in Patients With Atrial Fibrillation
Source: PubMed Central journal article supplement — J Am Heart Assoc. 2023 Mar 16;12(6):e028255. doi: 10.1161/JAHA.122.028255 (PMC10111531; doi:10.1161/jaha.122.028255), 2023-03-16

# Supplemental Material

## **Data S1**

### **Appendix**

#### **Swiss-AF Investigators**

**University Hospital Basel and Basel University:** Stefanie Aeschbacher, Katalin Bhend, Steffen Blum, Leo Bonati, David Conen, Ceylan Eken, Urs Fischer, Corinne Girroy, Elisa Hennings, Elena Herber, Vasco Iten, Philipp Krisai, Michael Kühne, Maurin Lampart, Mirko Lischer, Nina Mäder, Christine Meyer-Zürn, Pascal Meyre, Andreas U. Monsch, Luke Mosher, Christian Müller, Stefan Osswald, Rebecca E. Paladini, Anne Springer, Christian Sticherling, Thomas Szucs, Gian Völlmin. Principal Investigator: Stefan Osswald; Local Principal Investigator: Michael Kühne

**University Hospital Bern:** Faculty: Drahomir Aujesky, Juerg Fuhrer, Laurent Roten, Simon Jung, Heinrich Mattle; Research fellows: Seraina Netzer, Luise Adam, Carole Elodie Aubert, Martin Feller, Axel Loewe, Elisavet Moutzouri, Claudio Schneider; Study nurses: Tanja Flückiger, Cindy Groen, Lukas Ehram, Sven Hellrigl, Alexandra Nuoffer, Damiana Rakovic, Nathalie Schwab, Rylana Wenger, Tu Hanh Zarrabi Saffari. Local Principal Investigator: Nicolas Rodondi, Tobias Reichlin

**Stadtspital Triemli Zurich:** Christopher Beynon, Roger Dillier, Michèle Deubelbeiss, Franz Eberli, Christine Franzini, Isabel Juchli, Claudia Liedtke, Samira Murugiah, Jacqueline Nadler, Thayze Obst, Jasmin Roth, Fiona Schломowitsch, Xiaoye Schneider, Katrin Studerus, Noreen Tynan, Dominik Weishaupt. Local Principal Investigator: Andreas Müller

**Kantonspital Baden:** Simone Fontana, Corinne Friedli, Silke Kuest, Karin Scheuch, Denise Hischer, Nicole Bonetti, Alexandra Grau, Jonas Villinger, Eva Laube, Philipp Baumgartner, Mark Filipovic, Marcel Frick, Giulia Montrasio, Stefanie Leuenberger, Franziska Rutz. Local Principal Investigator: Jürg-Hans Beer

**Cardiocentro Lugano:** Angelo Auricchio, Adriana Anesini, Cristina Camporini, Giulio Conte, Maria Luce Caputo, Francois Regoli. Local Principal Investigator: Tiziano Moccetti

**Kantonsspital St. Gallen:** Roman Brenner, David Altmann, Michaela Gemperle. Local Principal Investigator: Peter Ammann

**Hôpital Cantonal Fribourg:** Mathieu Firmann, Sandrine Foucras, Martine Rime. Local Principal Investigator: Daniel Hayoz

**Luzerner Kantonsspital:** Benjamin Berte, Virginia Justi, Frauke Kellner-Weldon, Brigitta Mehmman, Sonja Meier, Myriam Roth, Andrea Ruckli-Kaeppeli, Ian Russi, Kai Schmidt, Mabelle Young, Melanie Zbinden. Local Principal Investigator: Richard Kobza

**Ente Ospedaliero Cantonale Lugano:** Elia Rigamonti, Carlo Cereda, Alessandro Cianfoni, Maria Luisa De Perna, Jane Frangi-Kultalahti, Patrizia Assunta Mayer Melchiorre, Anica Pin, Tatiana Terrot, Luisa Vicari. Local Principal Investigator: Giorgio Moschovitis.

**University Hospital Geneva:** Georg Ehret, Hervé Gallet, Elise Guillermet, Francois Lazeyras, Karl-Olof Lovblad, Patrick Perret, Philippe Tavel, Cheryl Teres. Local Principal Investigator: Dipen Shah

**University Hospital Lausanne:** Nathalie Lauriers, Marie Méan, Sandrine Salzmann, Jürg Schläpfer. Local Principal Investigator: Alessandra Pia Porretta

**Bürgerspital Solothurn:** Andrea Grêt, Jan Novak, Sandra Vitelli. Local Principal Investigator: Frank-Peter Stephan

**Ente Ospedaliero Cantonale Bellinzona:** Jane Frangi-Kultalahti, Augusto Gallino, Luisa Vicari. Local Principal Investigator: Marcello Di Valentino

**University of Zurich/University Hospital Zurich:** Helena Aebersold, Fabienne Foster, Matthias Schwenkglens.

**Medical Image Analysis Center AG Basel:** Jens Würfel (Head), Anna Altermatt, Michael Amann, Marco Düring, Petra Huber, Esther Ruberte, Tim Sinnecker, Vanessa Zuber.

**Clinical Trial Unit Basel:** Michael Coslovsky (Head), Pascal Benkert, Gilles Dutilh, Milica Markovic, Pia Neuschwander, Patrick Simon

**Schiller AG Baar:** Ramun Schmid

**Table S1. Definitions of adverse outcomes.**

| Adverse outcomes                  | Definition                                                                                                                                                                                                                                                                                                                                                                                                                                                                                                                                                                                                                                                                                                                                                                                                                                                                                                                                                                                                                                                                                                    |
|-----------------------------------|---------------------------------------------------------------------------------------------------------------------------------------------------------------------------------------------------------------------------------------------------------------------------------------------------------------------------------------------------------------------------------------------------------------------------------------------------------------------------------------------------------------------------------------------------------------------------------------------------------------------------------------------------------------------------------------------------------------------------------------------------------------------------------------------------------------------------------------------------------------------------------------------------------------------------------------------------------------------------------------------------------------------------------------------------------------------------------------------------------------|
| Death                             | Deaths were classified as either cardiovascular or non-cardiovascular origin. All deaths were assumed to be of cardiovascular origin unless a non-cardiovascular reason could be established. Cardiovascular deaths included cardiac deaths (e.g. cardiogenic shock, arrhythmia/sudden death, cardiac rupture) and other vascular deaths (e.g. stroke, pulmonary embolism, ruptured aortic aneurysm, or dissection). All hemorrhagic deaths were classified as cardiovascular deaths. Non-cardiovascular deaths included all deaths due to a clearly documented non-cardiac and non-vascular cause such as respiratory failure (excluding cardiogenic pulmonary edema), infection/sepsis, neoplasm, liver failure, renal failure, and trauma (including suicide and homicide).                                                                                                                                                                                                                                                                                                                                |
| Hospitalization for heart failure | Hospitalization for acute heart failure was defined as any hospitalization for acute heart failure that was associated with at least one overnight stay. If it was not clear whether the reason for a patient's hospitalization was acute heart failure or not, this event was in doubt be classified as acute heart failure. The following references mentioned under clinical examination, or in the progress entry were used as an indication for heart failure: leg swelling/leg edema, distension of the neck veins, positive hepato-jugular reflux, rales, and 3rd heart sound.                                                                                                                                                                                                                                                                                                                                                                                                                                                                                                                         |
| Stroke                            | Stroke was categorized as ischemic stroke, intracerebral hemorrhage, or undetermined stroke. Ischemic stroke was defined as a rapid onset of focal neurological dysfunction with clinical, imaging or pathological evidence of focal infarction of the brain, retina (excluding anterior ischemic optic neuropathy [AION]), or spinal cord explaining the dysfunction. Clinical evidence of infarction was based on symptoms persisting $\geq 24$ hours or until death, and exclusion of other etiologies (such as brain infection, trauma, tumor, seizure, severe metabolic disease, or degenerative neurological disease). Intracerebral hemorrhage was defined as a rapid onset of focal or global neurological dysfunction and/or headache attributable to a focal collection of blood within the brain parenchyma or ventricular system that was not caused by trauma. If the type of stroke could not be determined by imaging or other means (e.g., lumbar puncture, neurosurgery, or autopsy) but was judged to fulfil the stroke definition above, the stroke was classified as undetermined stroke. |
| Systemic embolism                 | A systemic arterial embolism was considered to have occurred when there was clear evidence of abrupt occlusion of a systemic artery consistent with an embolic event. Pulmonary embolism or deep vein thrombosis were not reported. Two criteria were required for an event to be defined as Systemic Arterial Embolism:<br>1. Clinical signs and symptoms consistent with embolic arterial occlusion<br>2. At least one of the following objective findings:<br>- Surgical report indicating evidence of arterial embolism<br>- Pathological specimens related to embolism removal<br>- Imaging evidence consistent with arterial embolism<br>- Autopsy reports                                                                                                                                                                                                                                                                                                                                                                                                                                              |
| Myocardial infarction             | Myocardial infarction (MI) was defined according to the universal definition of MI as rise and/or fall of cardiac troponin with at least one value above the 99th percentile of the upper reference limit in a clinical setting consistent with myocardial ischemia, and with at least one of the following:<br>- Symptoms of ischemia<br>- New ST elevation at the J point in two contiguous leads $> 0.1$ mV except for V2-V3. For leads V2-V3 the following cut points apply: $\geq 0.2$ mV in men $\geq 40$ years, $\geq 0.25$ mV in men $< 40$ years and $\geq 0.15$ mV in women on ECG<br>- New horizontal or down-sloping ST depression $\geq 0.05$ mV in two contiguous leads and/or T inversion $\geq 0.1$ mV in two contiguous leads with prominent R wave or R/S ratio $> 1$ .<br>- New left bundle brunch block on ECG<br>- Development of pathological Q waves on ECG<br>- Imaging evidence of new loss of viable myocardium or new regional wall motion<br>- Identification of an intracoronary thrombus by angiography or autopsy                                                              |

**Table S2. Association of BMP10 concentration and adverse outcomes – multivariable model additionally adjusted for NT-proBNP.**

| Adverse outcomes | BMP10 ng/ml       | Multivariable model* additionally adjusted for NT-proBNP <sup>§</sup> HR (95% CI) |
|------------------|-------------------|-----------------------------------------------------------------------------------|
| All-cause death  | Continuous        | 1.34 (1.13; 1.59), p <0.001                                                       |
|                  | Quartile I        | Reference                                                                         |
|                  | Quartile II       | 1.29 (0.87; 1.92)                                                                 |
|                  | Quartile III      | 1.37 (0.92; 2.03)                                                                 |
|                  | Quartile VI       | 1.76 (1.18; 2.64)                                                                 |
|                  | p linear trend    | 0.007                                                                             |
|                  | p quadratic trend | 1.0                                                                               |
|                  | p cubic trend     | 0.43                                                                              |
| MACE             | Continuous        | 1.24 (1.08; 1.44), p = 0.003                                                      |
|                  | Quartile I        | Reference                                                                         |
|                  | Quartile II       | 1.16 (0.87; 1.55)                                                                 |
|                  | Quartile III      | 1.22 (0.91; 1.63)                                                                 |
|                  | Quartile VI       | 1.46 (1.07; 1.98)                                                                 |
|                  | p linear trend    | 0.02                                                                              |
|                  | p quadratic trend | 0.87                                                                              |
|                  | p cubic trend     | 0.54                                                                              |

BMP10 = bone morphogenetic protein 10, CI = confidence interval, HR = hazard ratio, MACE = major adverse cardiovascular events (composite of hospitalization for heart failure, cardiovascular death, stroke, systemic embolism, myocardial infarction). <sup>§</sup>NT-proBNP was log-transformed.

\*adjusted for age, sex, body mass index, heart rate, systolic blood pressure, rhythm at baseline (sinus rhythm, atrial fibrillation, other), current smoking, history of diabetes, coronary artery disease, hypertension, heart failure, stroke/transient ischemic attack, oral anticoagulation, antiplatelet therapy, and estimated glomerular filtration rate. n = 2184.

**Table S3. Association of BMP10 concentration and adverse outcomes – multivariable model additionally adjusted for study centre.**

| <b>Adverse outcomes</b> | <b>BMP10 ng/ml</b> | <b>Multivariable model* additionally adjusted for study centre HR (95% CI)</b> |
|-------------------------|--------------------|--------------------------------------------------------------------------------|
| All-cause death         | Continuous         | 1.60 (1.36; 1.87), p <0.001                                                    |
|                         | Quartile I         | Reference                                                                      |
|                         | Quartile II        | 1.49 (1.00; 2.22)                                                              |
|                         | Quartile III       | 1.73 (1.17; 2.56)                                                              |
|                         | Quartile VI        | 2.55 (1.71; 3.81)                                                              |
|                         | p linear trend     | <0.001                                                                         |
|                         | p quadratic trend  | 0.96                                                                           |
|                         | p cubic trend      | 0.33                                                                           |
| MACE                    | Continuous         | 1.51 (1.32; 1.73), p <0.001                                                    |
|                         | Quartile I         | Reference                                                                      |
|                         | Quartile II        | 1.29 (0.97; 1.73)                                                              |
|                         | Quartile III       | 1.52 (1.14; 2.03)                                                              |
|                         | Quartile VI        | 2.07 (1.53; 2.80)                                                              |
|                         | p linear trend     | <0.001                                                                         |
|                         | p quadratic trend  | 0.79                                                                           |
|                         | p cubic trend      | 0.53                                                                           |

BMP10 = bone morphogenetic protein 10, CI = confidence interval, HR = hazard ratio, MACE = major adverse cardiovascular events (composite of hospitalization for heart failure, cardiovascular death, stroke, systemic embolism, myocardial infarction).

\*adjusted for age, sex, body mass index, heart rate, systolic blood pressure, rhythm at baseline (sinus rhythm, atrial fibrillation, other), current smoking, history of diabetes, coronary artery disease, hypertension, heart failure, stroke/transient ischemic attack, oral anticoagulation, antiplatelet therapy, and estimated glomerular filtration rate. n = 2184.

**Table S4. Association of NT-proBNP categories and adverse outcomes.**

| Adverse outcomes                  | NT-proBNP                   | Number of events | Patient-years | Incidence rate per 100 patient-years | Age- and sex-adjusted model HR (95% CI) | Multivariable adjusted model* HR (95% CI) |
|-----------------------------------|-----------------------------|------------------|---------------|--------------------------------------|-----------------------------------------|-------------------------------------------|
| All-cause death                   | Continuous <sup>§</sup>     | 395              | 9618          | 4.11                                 | 1.80 (1.63; 1.98), p <0.001             | 1.59 (1.40; 1.79), p <0.001               |
|                                   | Low (<300 ng/l)             | 37               | 3220          | 1.15                                 | Reference                               | Reference                                 |
|                                   | Intermediate (300-900 ng/l) | 87               | 2713          | 3.21                                 | 2.05 (1.39; 3.02)                       | 1.79 (1.19; 2.71)                         |
|                                   | High (>900 ng/l)            | 271              | 3685          | 7.35                                 | 3.99 (2.79; 5.70)                       | 2.79 (1.83; 4.27)                         |
|                                   | p linear trend              |                  |               |                                      | <0.001                                  | <0.001                                    |
|                                   | p quadratic trend           |                  |               |                                      | 0.85                                    | 0.62                                      |
| MACE                              | Continuous <sup>§</sup>     | 605              | 8648          | 7.00                                 | 1.73 (1.60; 1.86), p <0.001             | 1.64 (1.49; 1.81), p <0.001               |
|                                   | Low (<300 ng/l)             | 58               | 3124          | 1.86                                 | Reference                               | Reference                                 |
|                                   | Intermediate (300-900 ng/l) | 155              | 2440          | 6.35                                 | 2.81 (2.07; 3.81)                       | 2.59 (1.88; 3.56)                         |
|                                   | High (>900 ng/l)            | 392              | 3084          | 12.71                                | 4.93 (3.70; 6.57)                       | 4.01 (2.86; 5.63)                         |
|                                   | p linear trend              |                  |               |                                      | <0.001                                  | <0.001                                    |
|                                   | p quadratic trend           |                  |               |                                      | 0.03                                    | 0.02                                      |
| Hospitalization for heart failure | Continuous <sup>§</sup>     | 362              | 8929          | 4.05                                 | 2.01 (1.82; 2.22), p <0.001             | 1.91 (1.67; 2.17), p <0.001               |
|                                   | Low (<300 ng/l)             | 22               | 3172          | 0.69                                 | Reference                               | Reference                                 |
|                                   | Intermediate (300-900 ng/l) | 89               | 2537          | 3.51                                 | 4.28 (2.67; 6.86)                       | 3.68 (2.27; 5.95)                         |
|                                   | High (>900 ng/l)            | 251              | 3220          | 7.80                                 | 8.50 (5.43; 13.31)                      | 6.35 (3.88; 10.42)                        |
|                                   | p linear trend              |                  |               |                                      | <0.001                                  | <0.001                                    |
|                                   | p quadratic trend           |                  |               |                                      | 0.01                                    | 0.01                                      |
| Cardiovascular death              | Continuous <sup>§</sup>     | 254              | 9618          | 2.64                                 | 1.88 (1.66; 2.12), p <0.001             | 1.62 (1.39; 1.90), p <0.001               |
|                                   | Low (<300 ng/l)             | 17               | 3220          | 0.53                                 | Reference                               | Reference                                 |
|                                   | Intermediate (300-900 ng/l) | 52               | 2713          | 1.92                                 | 2.56 (1.47; 4.44)                       | 2.23 (1.22; 4.06)                         |
|                                   | High (>900 ng/l)            | 185              | 3685          | 5.02                                 | 5.54 (3.32; 9.24)                       | 3.72 (2.03; 6.82)                         |
|                                   | p linear trend              |                  |               |                                      | <0.001                                  | <0.001                                    |
|                                   | p quadratic trend           |                  |               |                                      | 0.66                                    | 0.46                                      |

|                              |                             |     |      |      |                             |                             |
|------------------------------|-----------------------------|-----|------|------|-----------------------------|-----------------------------|
| Stroke and systemic embolism | Continuous <sup>§</sup>     | 114 | 9406 | 1.21 | 1.35 (1.15; 1.60), p <0.001 | 1.26 (1.01; 1.57), p = 0.04 |
|                              | Low (<300 ng/l)             | 12  | 3191 | 0.38 | Reference                   | Reference                   |
|                              | Intermediate (300-900 ng/l) | 41  | 2639 | 1.55 | 3.38 (1.76; 6.50)           | 2.95 (1.47; 5.89)           |
|                              | High (>900 ng/l)            | 61  | 3576 | 1.71 | 3.29 (1.72; 6.28)           | 2.37 (1.09; 5.15)           |
|                              | p linear trend              |     |      |      | <0.001                      | 0.03                        |
|                              | p quadratic trend           |     |      |      | 0.01                        | 0.004                       |
| Stroke                       | Continuous <sup>§</sup>     | 107 | 9427 | 1.14 | 1.34 (1.12; 1.59), p <0.001 | 1.25 (0.99; 1.57), p = 0.06 |
|                              | Low (<300 ng/l)             | 11  | 3196 | 0.34 | Reference                   | Reference                   |
|                              | Intermediate (300-900 ng/l) | 39  | 2644 | 1.48 | 3.50 (1.77; 6.90)           | 3.08 (1.50; 6.34)           |
|                              | High (>900 ng/l)            | 57  | 3587 | 1.59 | 3.34 (1.70; 6.55)           | 2.51 (1.12; 5.61)           |
|                              | p linear trend              |     |      |      | <0.001                      | 0.02                        |
|                              | p quadratic trend           |     |      |      | <0.001                      | 0.004                       |
| Myocardial infarction        | Continuous <sup>§</sup>     | 81  | 9459 | 0.86 | 1.28 (1.05; 1.55), p = 0.01 | 1.31 (1.02; 1.69), p = 0.04 |
|                              | Low (<300 ng/l)             | 15  | 3194 | 0.47 | Reference                   | Reference                   |
|                              | Intermediate (300-900 ng/l) | 21  | 2663 | 0.79 | 1.36 (0.69; 2.67)           | 1.27 (0.63; 2.58)           |
|                              | High (>900 ng/l)            | 45  | 3602 | 1.25 | 1.86 (1.00; 3.48)           | 1.87 (0.86; 4.06)           |
|                              | p linear trend              |     |      |      | 0.05                        | 0.11                        |
|                              | p quadratic trend           |     |      |      | 0.98                        | 0.79                        |

CI = confidence interval, HR = hazard ratio, MACE = major adverse cardiovascular events (composite of hospitalization for heart failure, cardiovascular death, stroke, systemic embolism, myocardial infarction). NT-proBNP = N-terminal prohormone of brain natriuretic peptide. n = 2219 (Low NT-proBNP n = 697, Intermediate NT-proBNP n = 617, High NT-proBNP n = 905). <sup>§</sup> NT-proBNP was log-transformed. \* adjusted for age, sex, body mass index, heart rate, systolic blood pressure, rhythm at baseline (sinus rhythm, atrial fibrillation, other), current smoking, history of diabetes, coronary artery disease, hypertension, heart failure, stroke/transient ischemic attack, oral anticoagulation, antiplatelet therapy, and estimated glomerular filtration rate. n = 2184.



**Figure S1. Histogram of BMP10.**

Overall distribution of BMP10 concentration. BMP10 = bone morphogenetic protein 10.

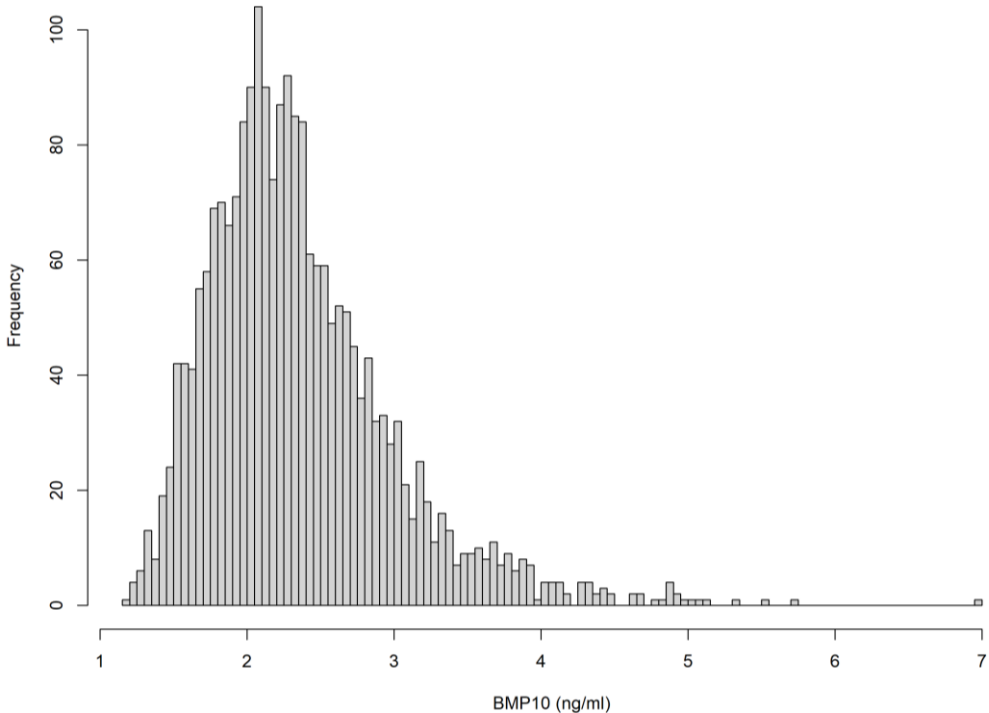

**Figure S2. Histogram of NT-proBNP.**

Overall distribution of NT-proBNP concentration. The excerpt shows only patients with NT-proBNP <5000 ng/l.

NT-proBNP = N-terminal prohormone of brain natriuretic peptide.

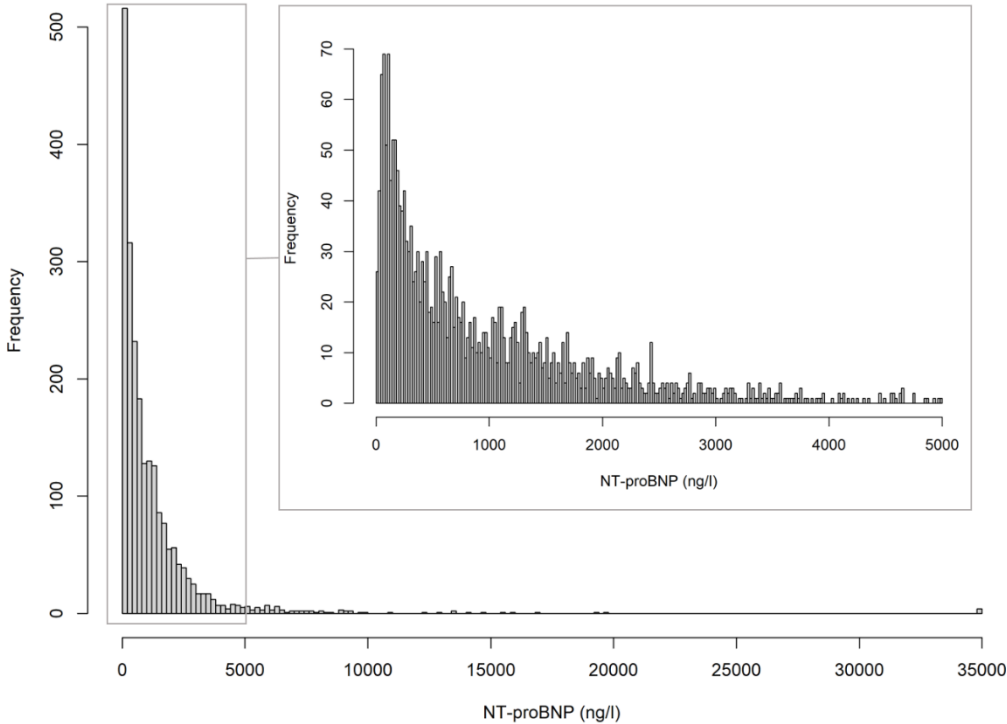

**Figure S3. Violin boxplots of BMP10 according to AF type and rhythm.**

**(A)** BMP10 concentration according to AF type. Non-paroxysmal AF type includes patients with persistent and permanent AF. p-value <0.001 (Mann-Whitney U test). **(B)** BMP10 concentration according to rhythm at baseline visit assessed with a resting 16-lead electrocardiogram of 5 min duration. p-value <0.001 (Kruskal-Wallis test). AF = atrial fibrillation, BMP10 = bone morphogenetic protein 10, SR = sinus rhythm.

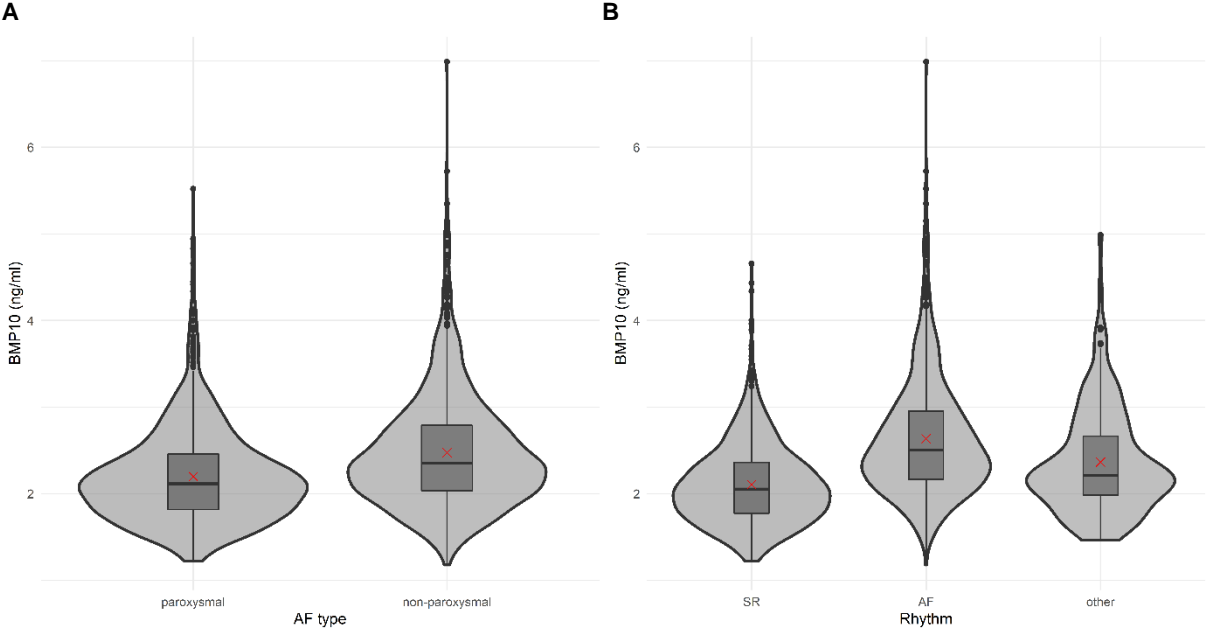

**Figure S4. Scatterplot of BMP10 and NT-proBNP.**

The correlation between BMP10 and NT-proBNP was calculated with the Spearman's rank correlation coefficient (0.59). NT-proBNP was log-transformed for the scatterplot. BMP10 = bone morphogenetic protein 10, NT-proBNP = N-terminal prohormone of brain natriuretic peptide.

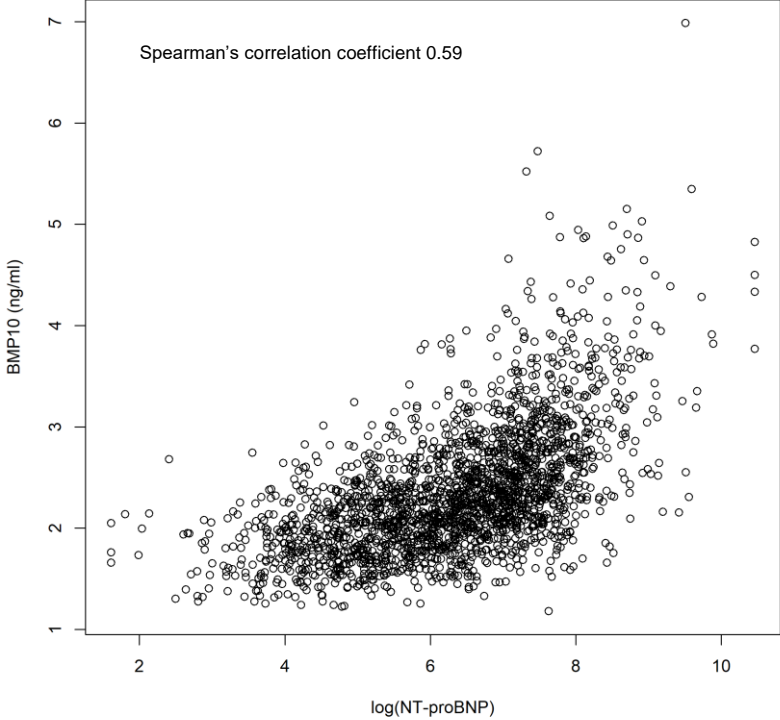

Supplement: JAH3-12-e028255-s001.pdf [file JAH3-12-e028255-s001.pdf]
